# Supplementary material
Source: publisher site journal article supplement (https://www.spandidos-publications.com/5106/downloadSupplementary)
Supplement: Supplementary file 1 [file downloadSupplementary]

## Sheet: Table S9
Table SIX. Univariate Cox expression analysis of DNSE2B.
Cancer	HR	HR.95L	HR.95H	P-value
ACC	2.79808	0.276363	28.3297	0.383676
BLCA	0.211524	0.0626154	0.714558	0.0123812
BRCA	0.965166	0.727326	1.28078	0.805981
CESC	0.593144	0.110321	3.18907	0.542778
CHOL	1.03671	0.115021	9.34409	0.974364
COAD	1.04351	0.367198	2.96547	0.936297
DLBC	0.000216832	3.90895e-09	12.0279	0.130103
ESCA	1.84225	0.548866	6.18346	0.322685
GBM	0.55951	0.28397	1.10241	0.0933106
HNSC	0.702007	0.39837	1.23707	0.22096
KICH	0.00316168	3.85661e-07	25.9198	0.21056
KIRC	0.514872	0.302822	0.875409	0.0142332
KIRP	0.515079	0.273826	0.968884	0.039588
LAML	0.000491331	1.14855e-06	0.210182	0.0137184
LGG	1.80254	1.14731	2.83199	0.0105844
LIHC	1.42409	0.779378	2.6021	0.25035
LUAD	0.613034	0.422557	0.889373	0.00995166
LUSC	0.937295	0.654885	1.34149	0.723343
MESO	0.865786	0.42657	1.75724	0.689864
OV	0.460343	0.099647	2.12667	0.32043
PAAD	0.77076	0.482856	1.23033	0.275163
PCPG	9.1475	0.446232	187.519	0.150903
PRAD	1.07523	0.698902	1.6542	0.741377
READ	5.2628	0.79437	34.8667	0.085188
SARC	0.576059	0.158231	2.09722	0.402823
SKCM	0.979468	0.896779	1.06978	0.644785
STAD	0.924471	0.581036	1.4709	0.740312
TGCT	0.798961	0.066349	9.62094	0.85968
THCA	3.13865	0.477895	20.6136	0.233623
THYM	1.67915	0.332555	8.47843	0.530431
UCEC	0.443142	0.0529843	3.70629	0.452625
UCS	0.706184	0.000468271	1064.97	0.925773
UVM	2.70716	0.575137	12.7426	0.20764
